# Supplementary material for: A surfactant polymer wound dressing protects human keratinocytes from inducible necroptosis
Source: PubMed Central journal article supplement (PMC7902632; doi:10.1038/s41598-021-82260-x), 2021-02-23
Supplement: 41598_2021_82260_MOESM1_ESM.pdf [file 41598_2021_82260_MOESM1_ESM.pdf]

**A SURFACTANT POLYMER WOUND DRESSING PROTECTS  
HUMAN KERATINOCYTES FROM INDUCIBLE NECROPTOSIS**

Puneet Khandelwal<sup>1\*</sup>, Amitava Das<sup>1\*</sup>, Chandan K. Sen<sup>1</sup>, Sangly P. Srinivas<sup>2</sup>, Sashwati Roy<sup>1</sup> and Savita Khanna<sup>1#</sup>

*<sup>1</sup>Department of Surgery, Indiana Center for Regenerative Medicine and Engineering, Indiana University School of Medicine, Indianapolis, IN, 46202. <sup>2</sup>School of Optometry, Indiana University, 800 East Atwater Avenue, Bloomington, Indiana, 47405, USA. #Corresponding author.*

*\* these authors contributed equally*

**Running Title:** Surfactant Polymer Dressing against cell death

**Address correspondence to:**

Savita Khanna, PhD

975 W Walnut St,

Medical Research Library Building,

Indiana University School of Medicine

Indianapolis, IN 46202.

Tel. 317 278 2736

E-mail: [sjkhanna@iu.edu](mailto:sjkhanna@iu.edu)

## **Supplementary Figure Legends**

### **Figure S1. SPD is not cytotoxic to human keratinocytes (HaCaT).**

HaCaT cells were treated with SPD (0, 20, 50, 100, 200, and 400mg/mL) for 24h. Cells were stained with PI for flow cytometry. Flow cytometry histograms and quantification showing %PI-positive cells upon treatment with increasing concentration (0, 20, 50, 100, 200, and 400mg/mL) of SPD for **(A,B)** 6h, **(C,D)** 12h, and **(E,F)** 24h. Data represent mean  $\pm$  SEM. (n=4-8). \*p<0.05 compared to untreated control.

### **Figure S2. Pre-treatment of primary human epidermal keratinocytes (HEKa) with SPD protected against TX100-induced cell death.**

HEKa cells were pretreated with SPD (100mg/mL) for 24h and then exposed to TX100 (0.2mM) for 3h in the continued presence of SPD (100mg/mL). Cells were stained with PI for flow cytometry. Flow cytometry histograms and quantification of %PI-positive cells. Data represent mean  $\pm$ SEM (n=8-9). \*p<0.05 compared to control (TX100-untreated). †p<0.05 compared to TX100-treated group.

### **Figure S3. Representative images of quantification of co-localization.**

Co-localization was measured using Zen Blue software (v.3.1).

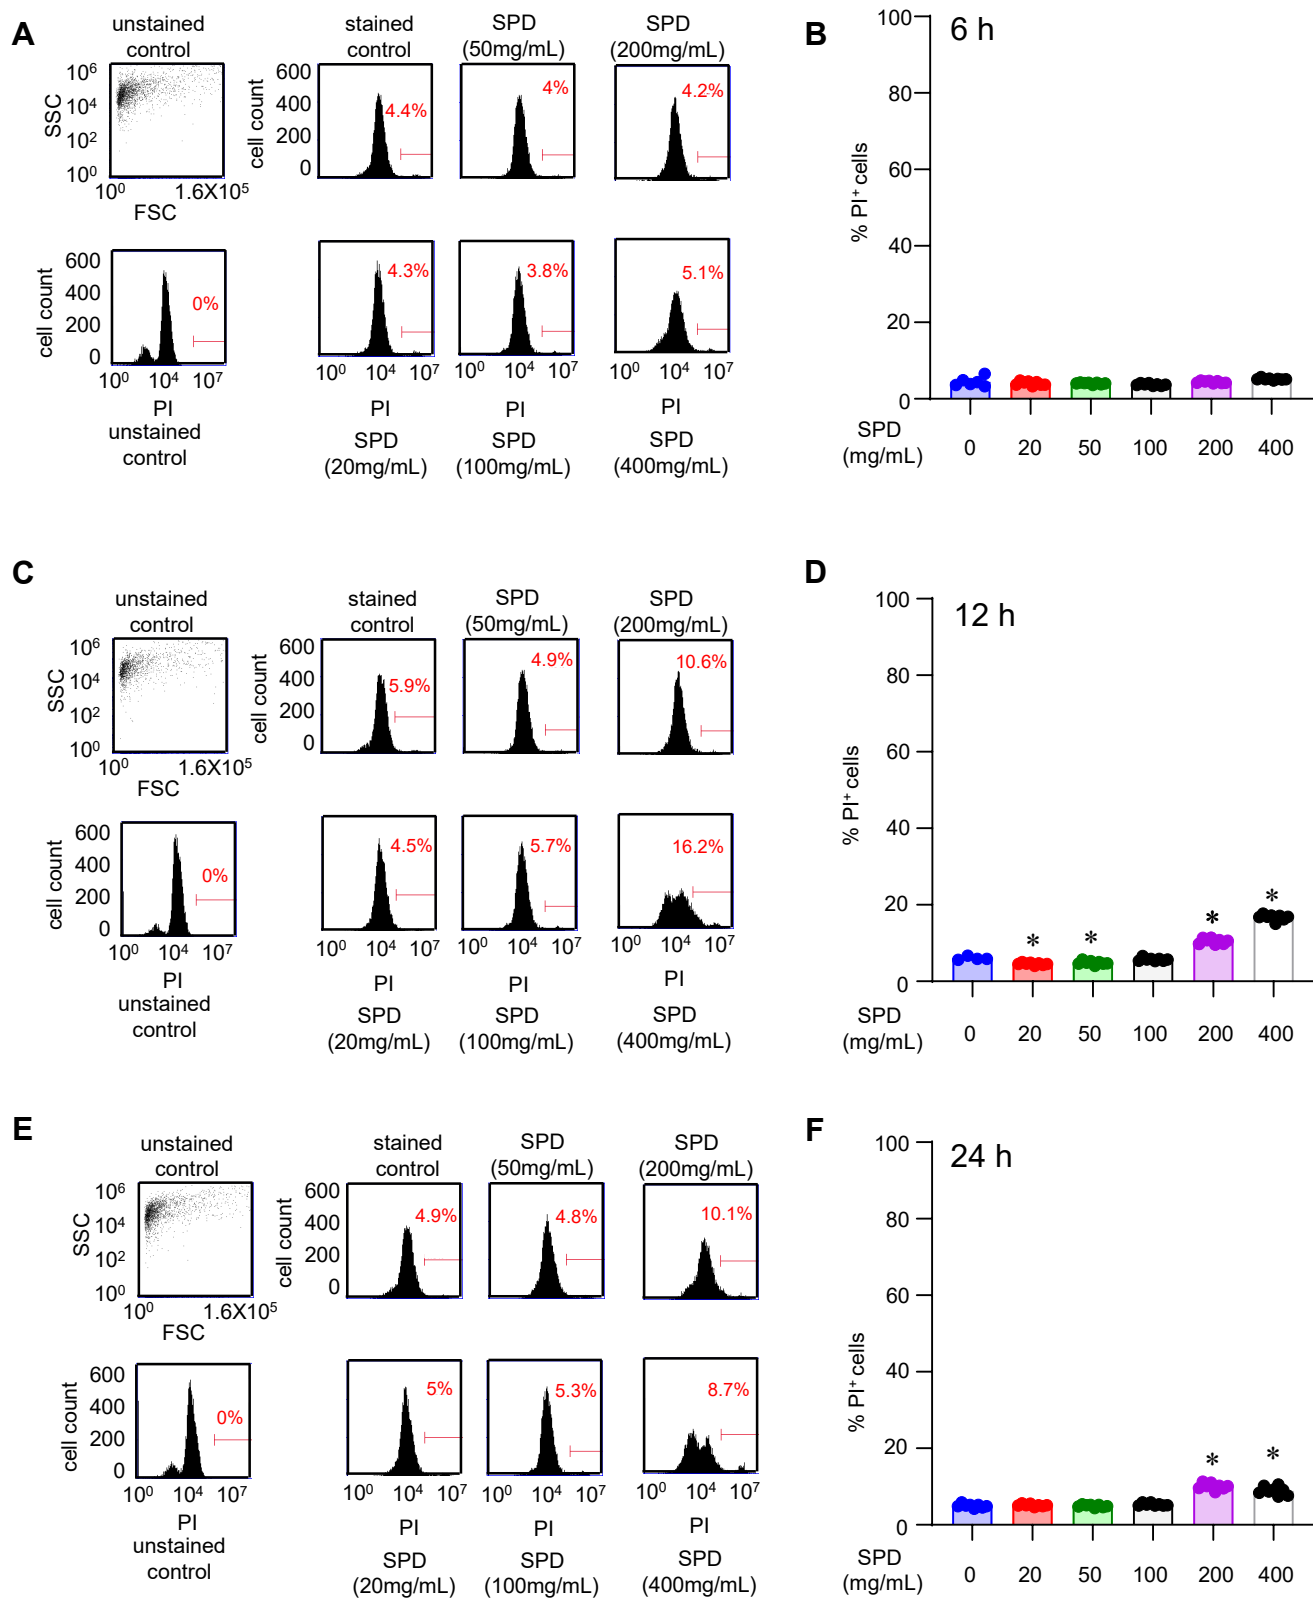

**Fig S1**

**A**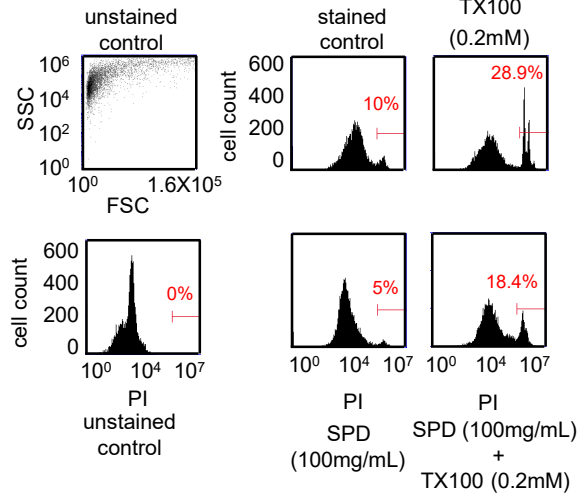**B**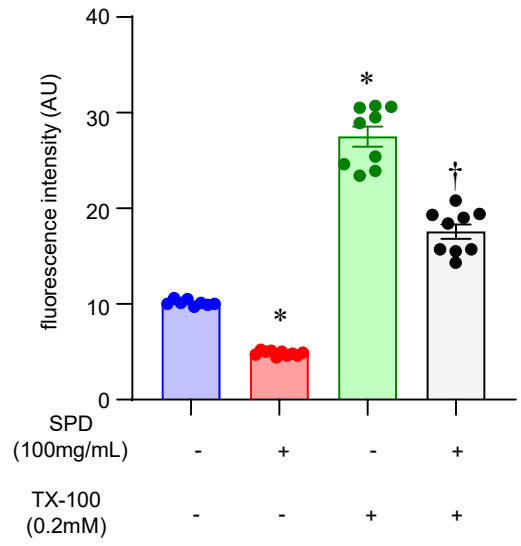

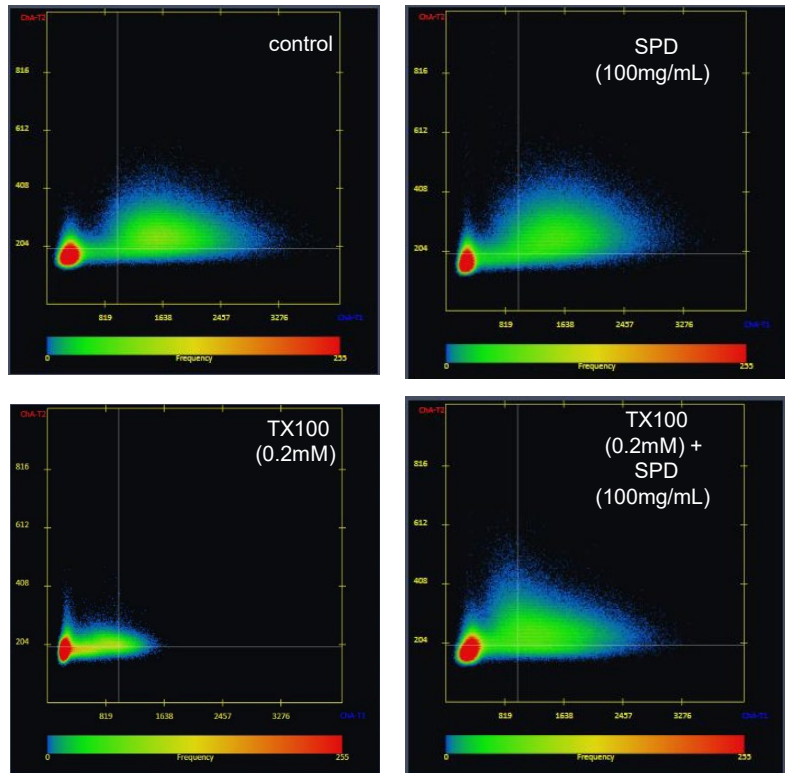

Fig S3
